# Supplementary material
Source: PubMed Central journal article supplement (PMC3516183)
Supplement: NIHMS395797-supplement-02.pdf [file NIHMS395797-supplement-02.pdf]

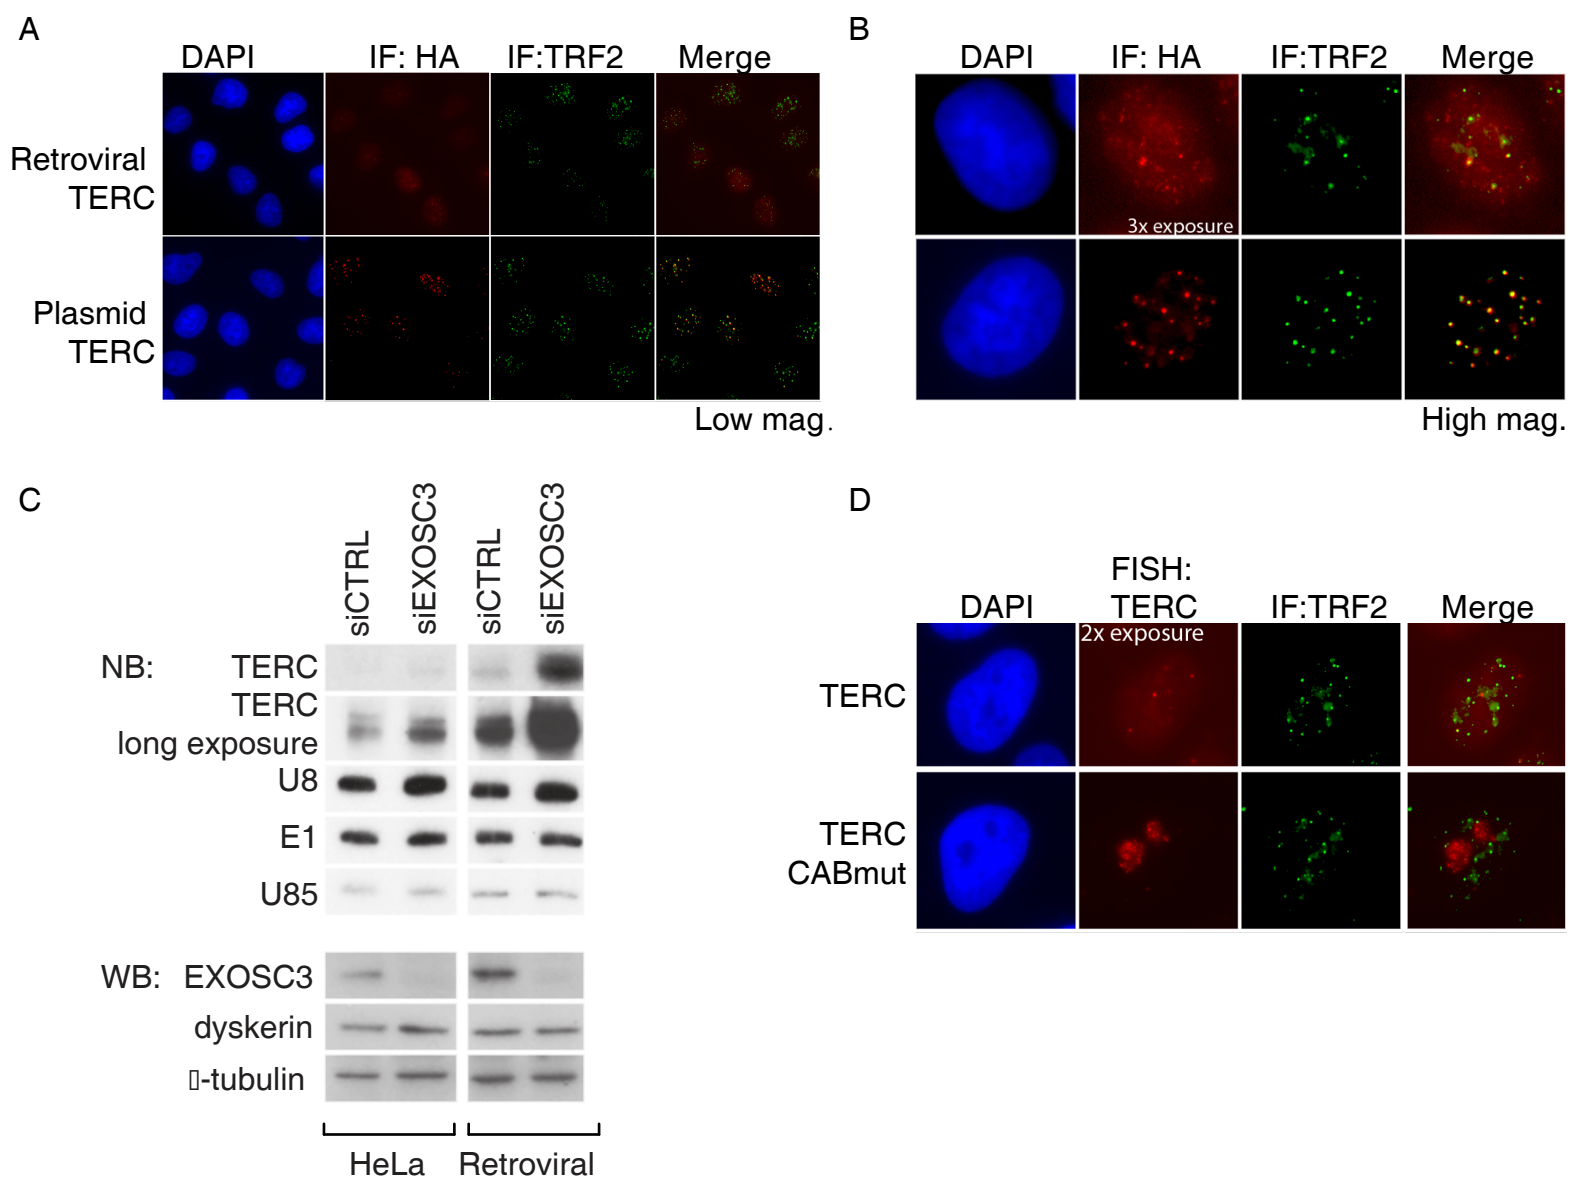

Supplemental Fig 2

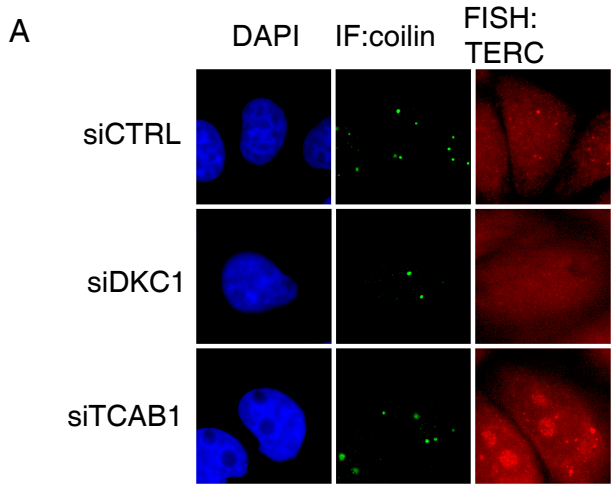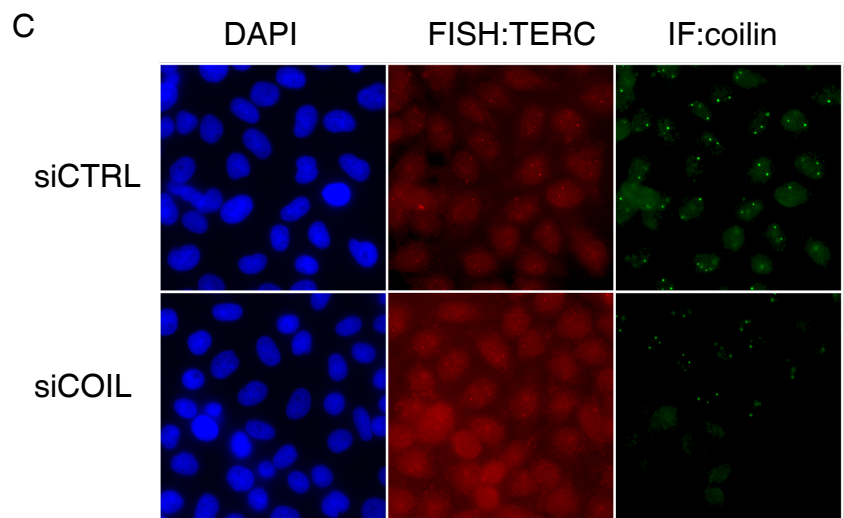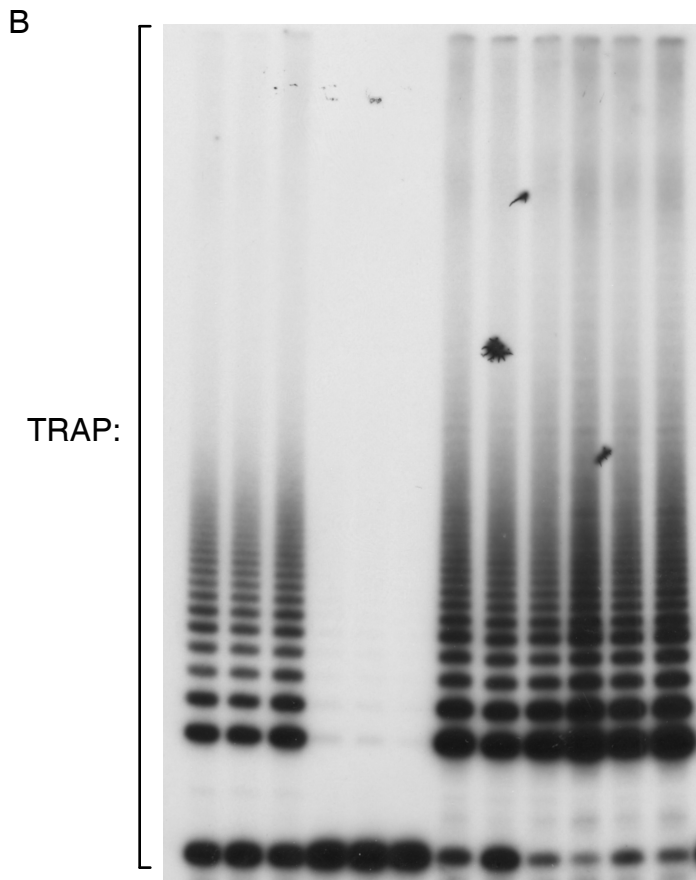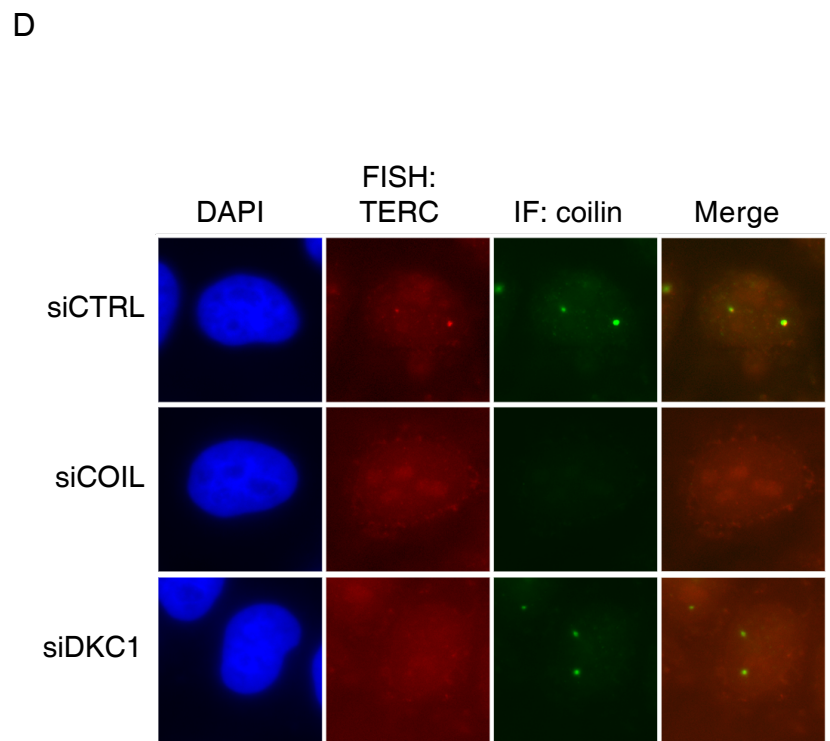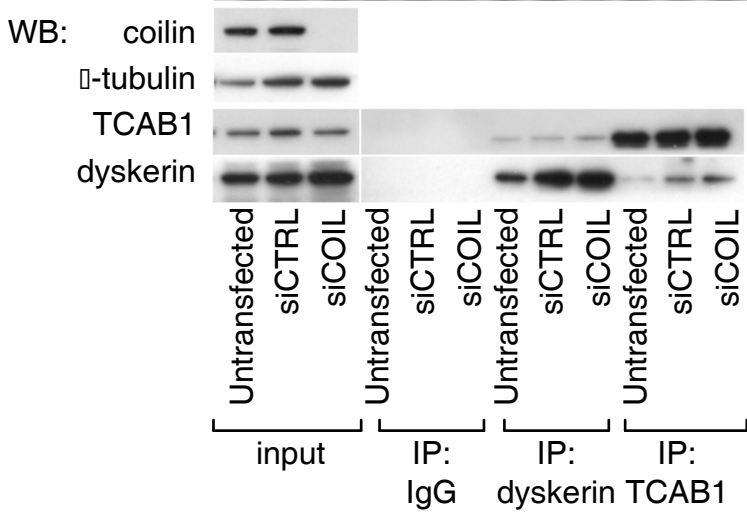

Supplemental Fig 3

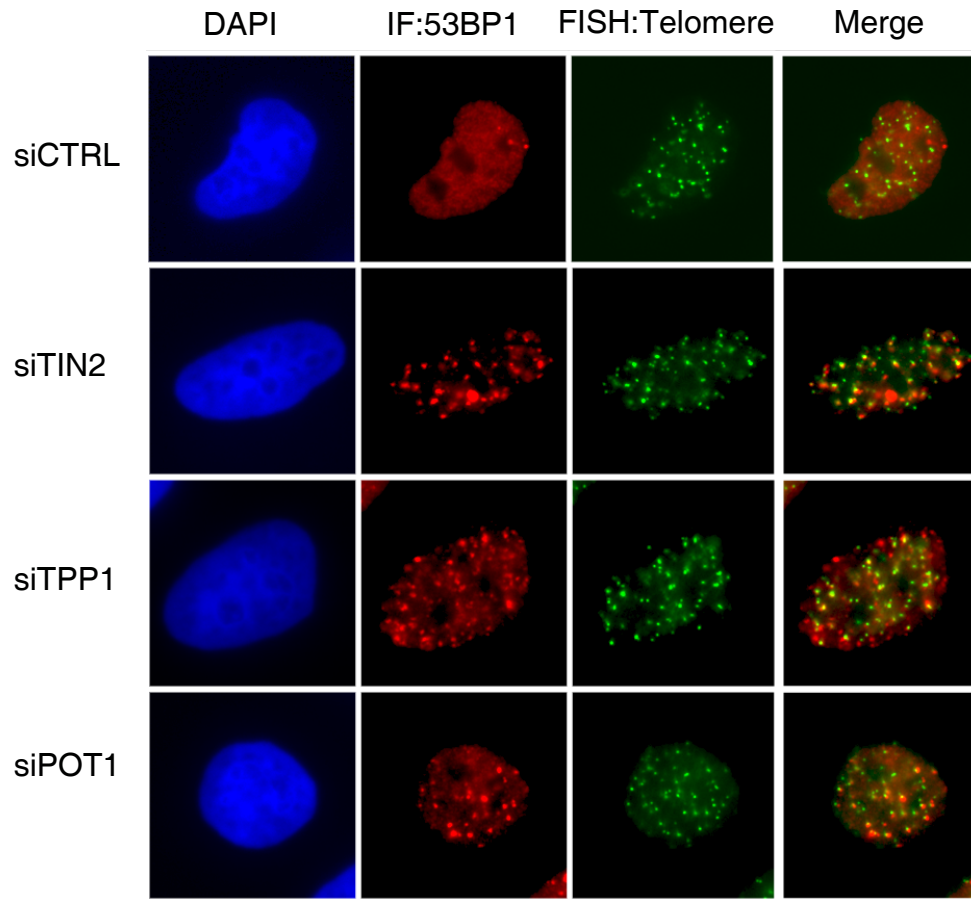

Supplemental Fig 4

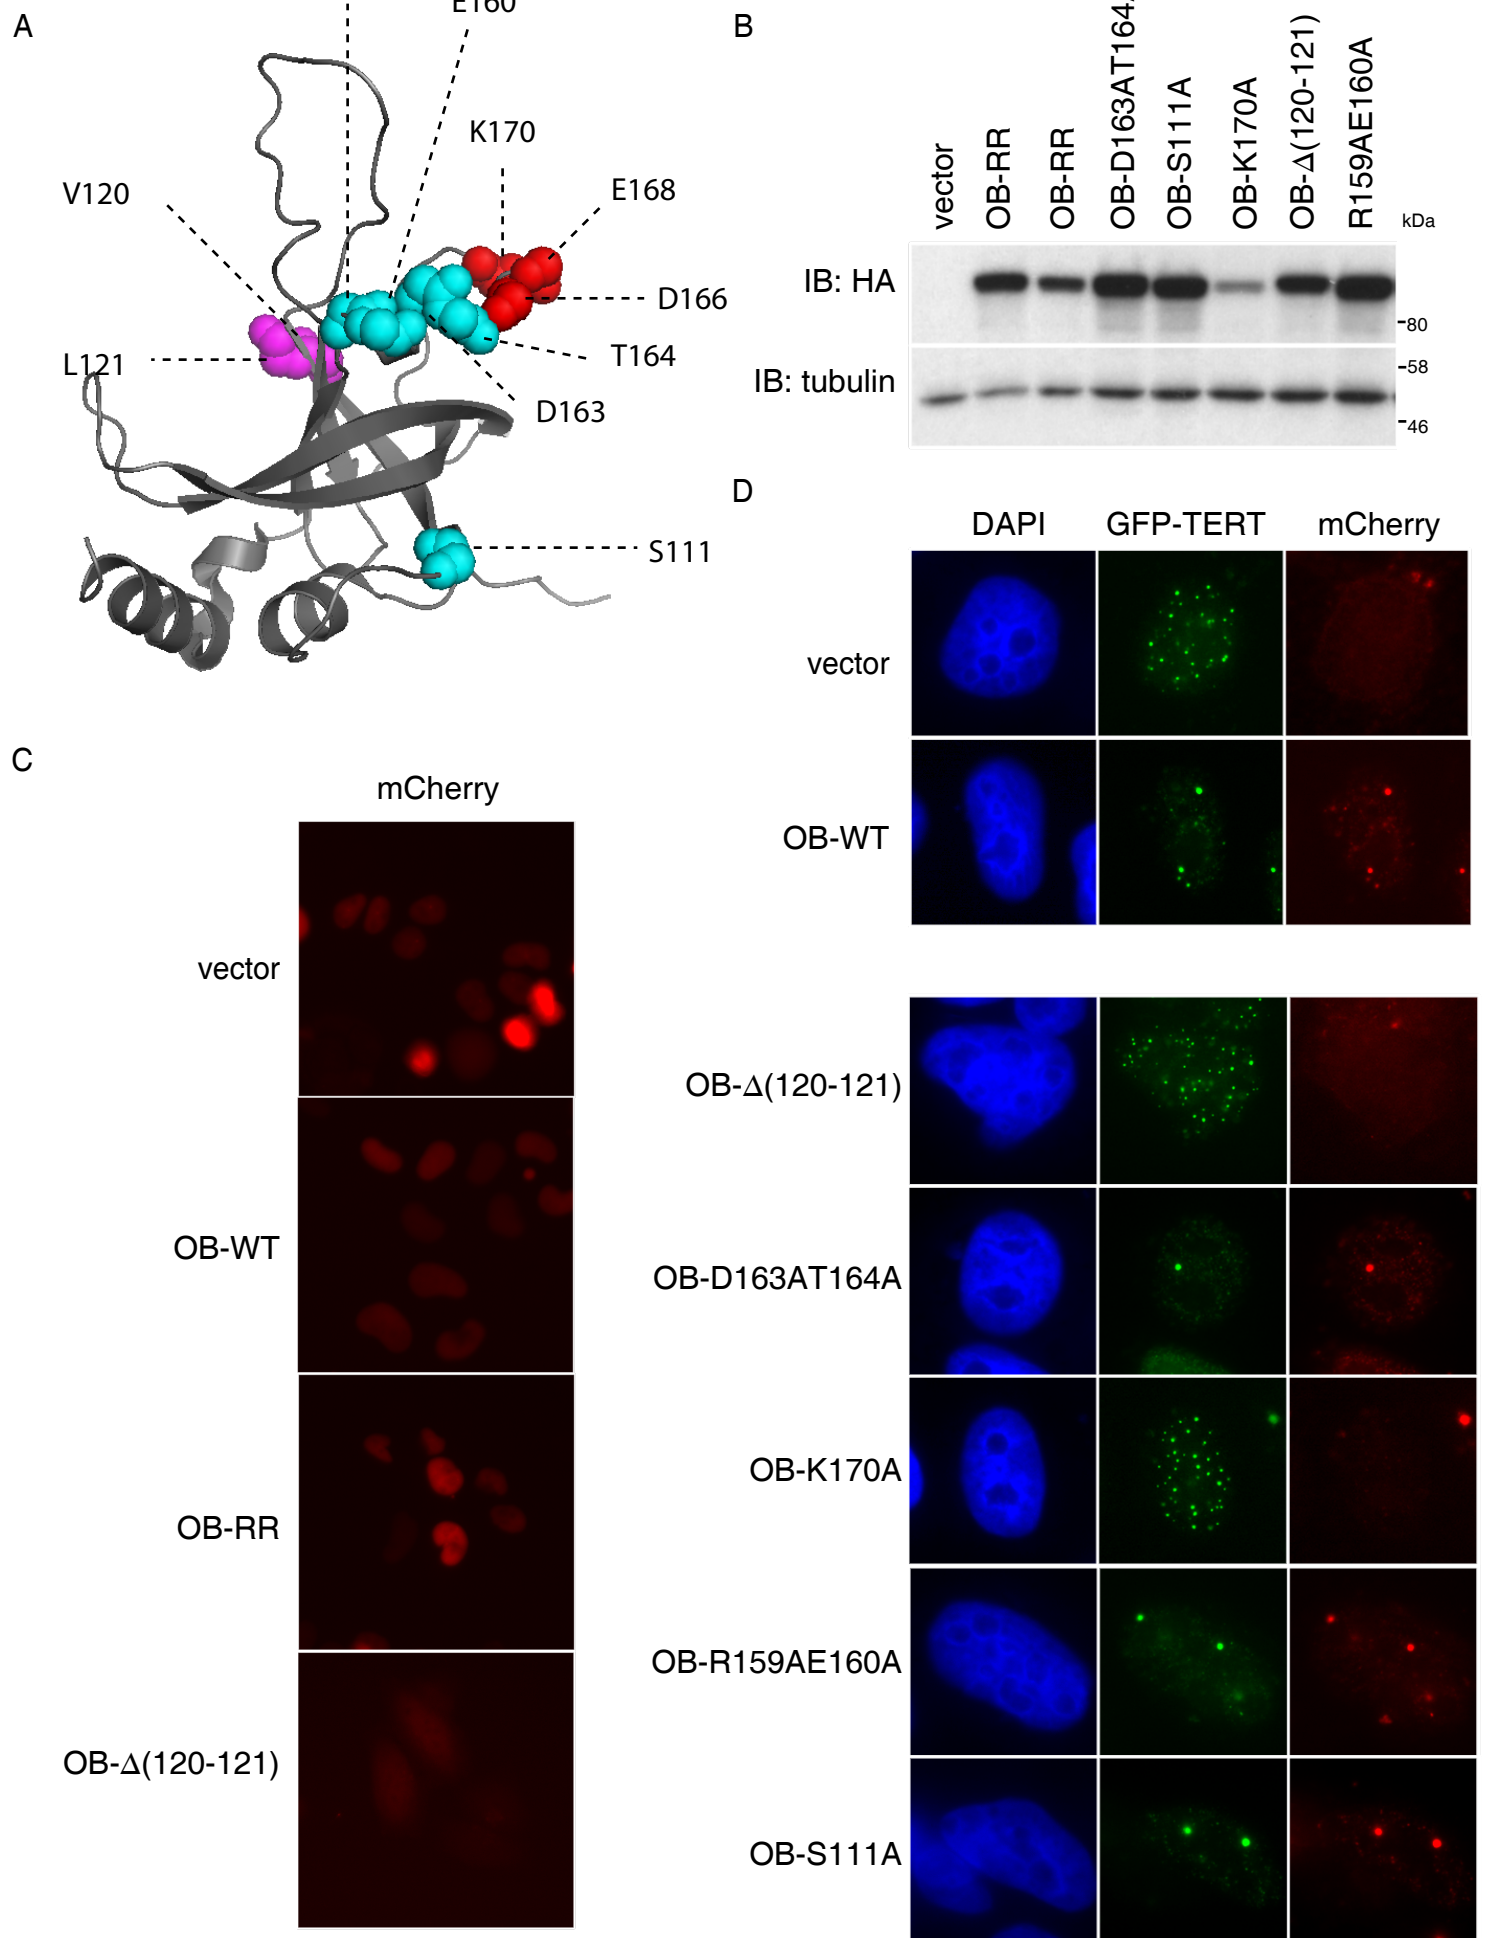

Supplemental Fig 5

A

|          |     |                     |                          |                              |                         |                                 |            |     |
|----------|-----|---------------------|--------------------------|------------------------------|-------------------------|---------------------------------|------------|-----|
| ScEst3   | 1   | <b>MPKVI</b>        | <b>LESHSKPT</b>          | <b>DSVFLQPWIKAL</b>          | <b>IEDNSEHDQYHPSGHV</b> | <b>IPSLTKQDL</b>                | 50         |     |
| hTPP1-OB | 1   | - - - - -           | <b>SGRLVLRPWIRELILG-</b> | <b>SETPSSPRAGQLLEVLQDAEA</b> |                         |                                 | 37         |     |
| ScEst3   | 51  | <b>ALPHMSPT</b>     | <b>ILTNPCHF</b>          | <b>AKITKFYNVCDYK</b>         | <b>VYASIRDSSHQ</b>      | <b>ILVEFSQECV</b>               | 100        |     |
| hTPP1-OB | 38  | <b>AV</b>           | - - - - -                | <b>AGPSHAP</b>               | - - - - -               | <b>DTSDVGATLLVSDGTHSVRCLVTR</b> | 73         |     |
| ScEst3   | 101 | <b>SNFERTHNC</b>    | <b>RTSETTNCLMI</b>       | <b>IGDADL</b>                | <b>-VYVTNSRAMSHFK</b>   | <b>ICLSN</b>                    | <b>SSK</b> | 149 |
| hTPP1-OB | 74  | <b>DTSDWEEKE</b>    | <b>FGRGTEGRLL</b>        | <b>LLQDCGVHVQVA</b>          | <b>EGGAPAEFYLQVDRFS</b> | - -                             | 121        |     |
| ScEst3   | 150 | <b>EIVPVLNVNQAT</b> | <b>IFDIDQVGS</b>         | <b>LSTFPFVYKYL</b>           | - - -                   |                                 | 181        |     |
| hTPP1-OB | 122 | - - - -             | <b>LLPTEQPRLRVP</b>      | <b>PGCNQDL</b>               | <b>LDVQKKLYDCLEEH</b>   |                                 | 152        |     |

B

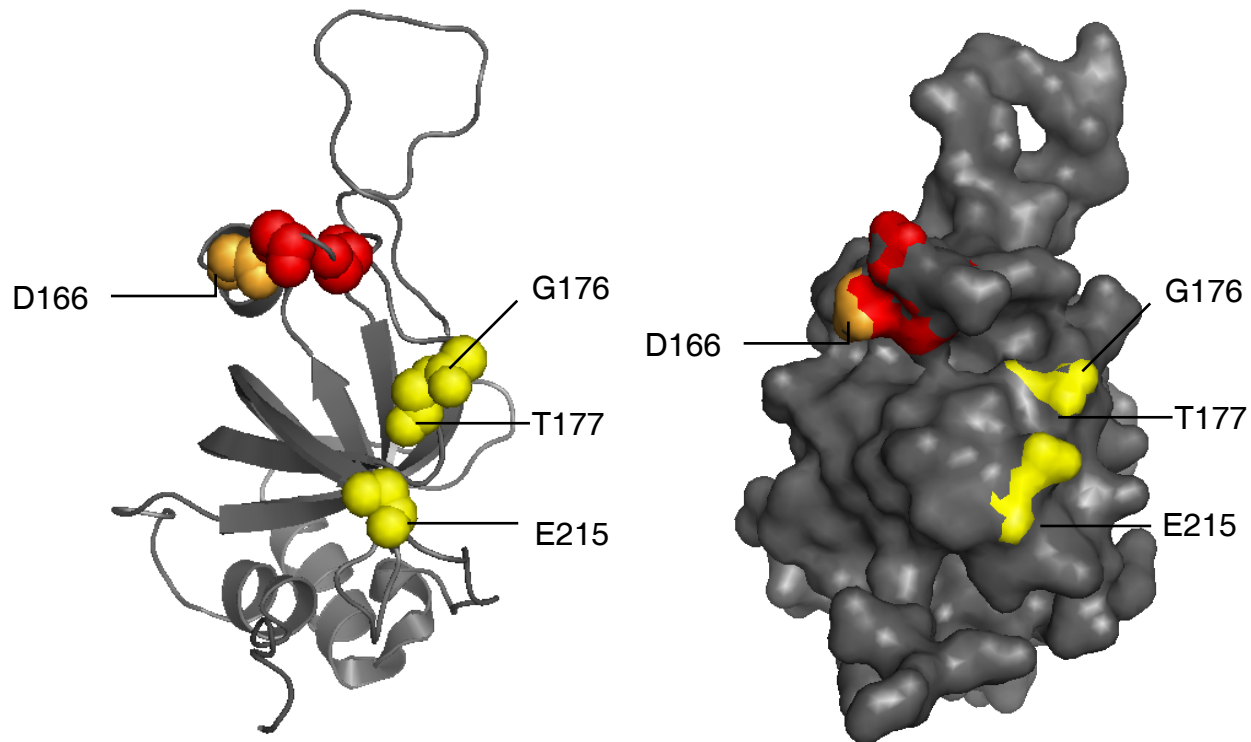

Supplemental Fig 6

A

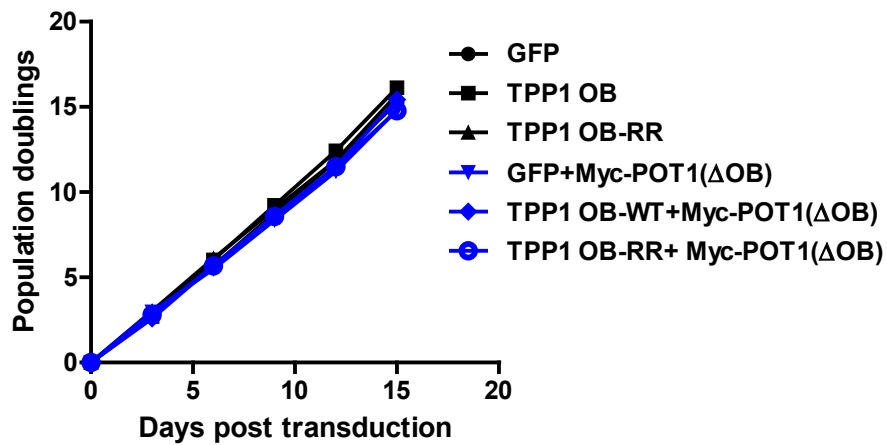

B

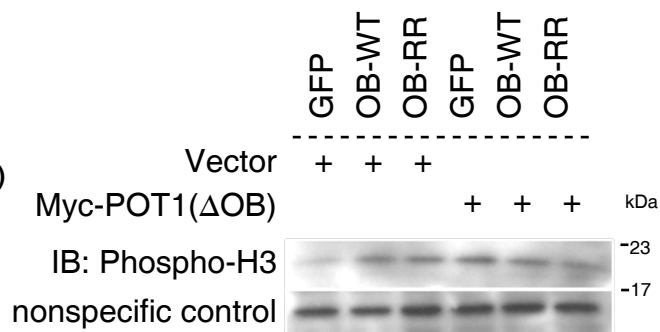

C

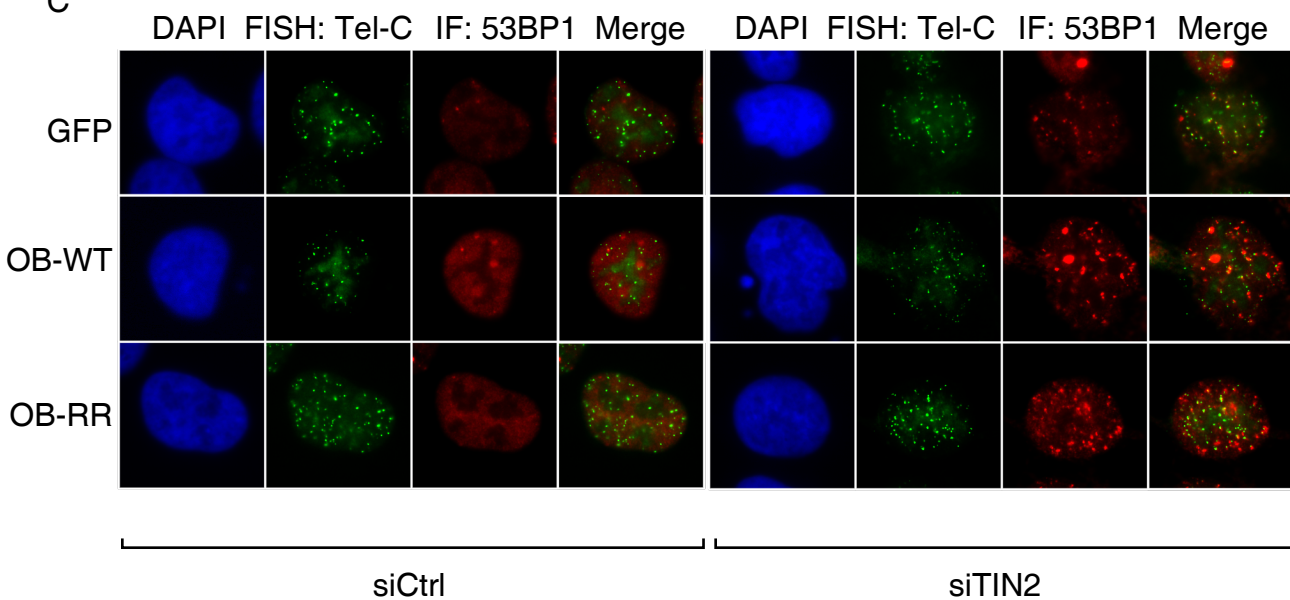

D

| Nuclei with >5 TIFs (n) |               |      |        |                 |      |
|-------------------------|---------------|------|--------|-----------------|------|
| siCtrl                  |               |      | siTIN2 |                 |      |
| GFP                     | 5 (144), 3.5% | n.s. | GFP    | 46 (127), 36.2% | n.s. |
| OB-WT                   | 6 (126), 4.8% | n.s. | OB-WT  | 41 (111), 36.9% | n.s. |
| OB-RR                   | 4 (113), 3.5% | n.s. | OB-RR  | 39 (116), 33.6% | n.s. |

E

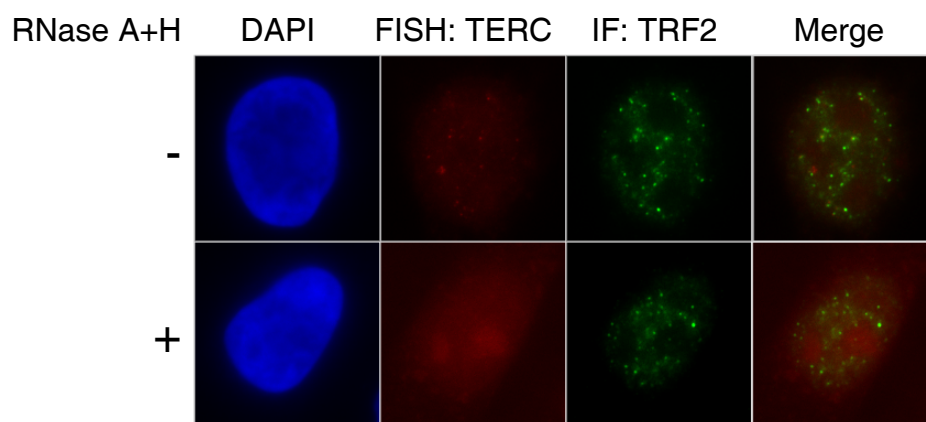

A

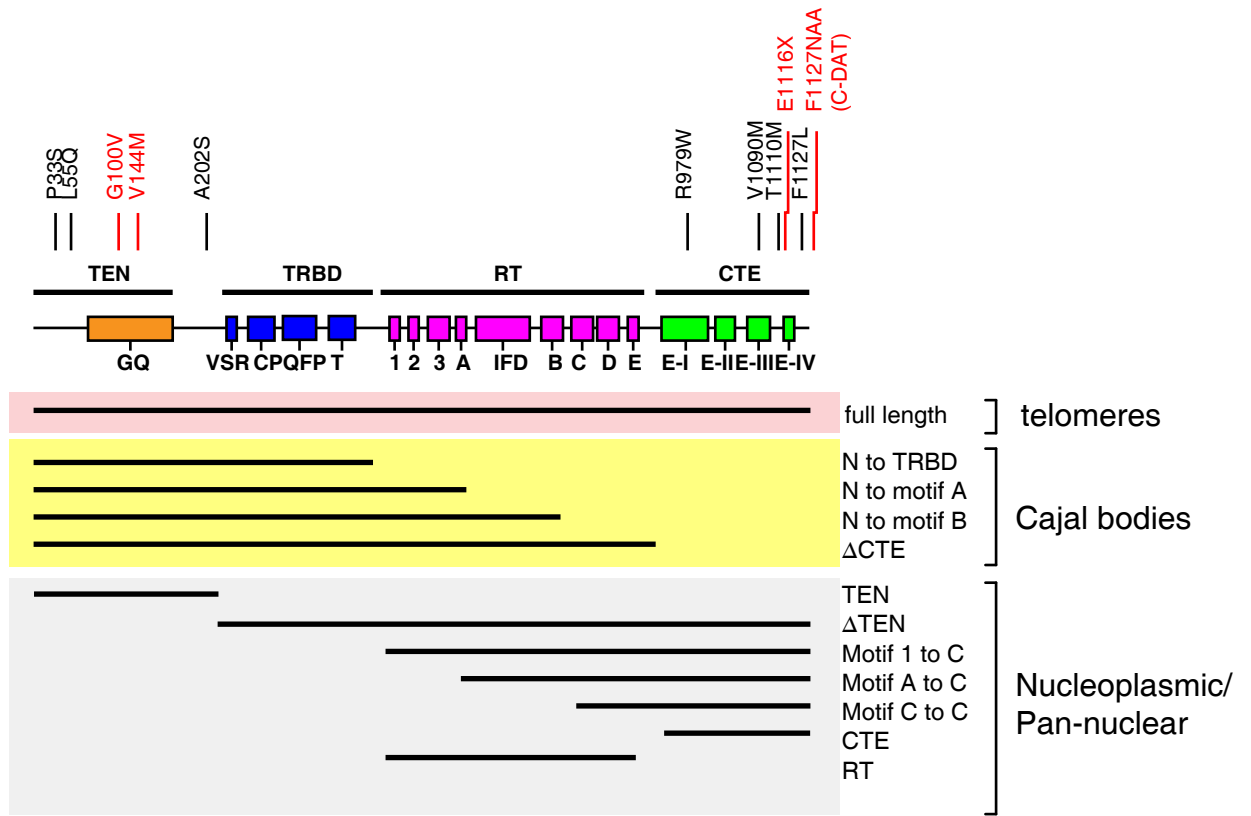

B

| Mutation in TERT | Associated disease | % of Catalytic function |
|------------------|--------------------|-------------------------|
| P33S             | IPF                | ~100%                   |
| L55Q             | IPF                | ~40%                    |
| G100V            | -                  | 25%                     |
| V144M            | IPF                | ~80%-100%               |
| A202S            | AA                 | <20%                    |
| R979W            | AA/DC              | <10%                    |
| V1090M           | AA                 | <20%                    |
| V1110M           | IPF                | ~50%                    |
| E1116fsX         | IPF/AA             | ~10%                    |
| F1127L           | HH/DC              | -                       |
| 1127NAA(C-DAT)   | -                  | ~100%                   |
